# Supplementary material
Source: PubMed Central journal article supplement (PMC3169821)
Supplement: mmc1.pdf [file mmc1.pdf]

**The American Journal of Human Genetics, Volume 89**

**Supplemental Data**

**A General Framework for Detecting Disease Associations  
with Rare Variants in Sequencing Studies**

**Dan-Yu Lin and Zheng-Zheng Tang**

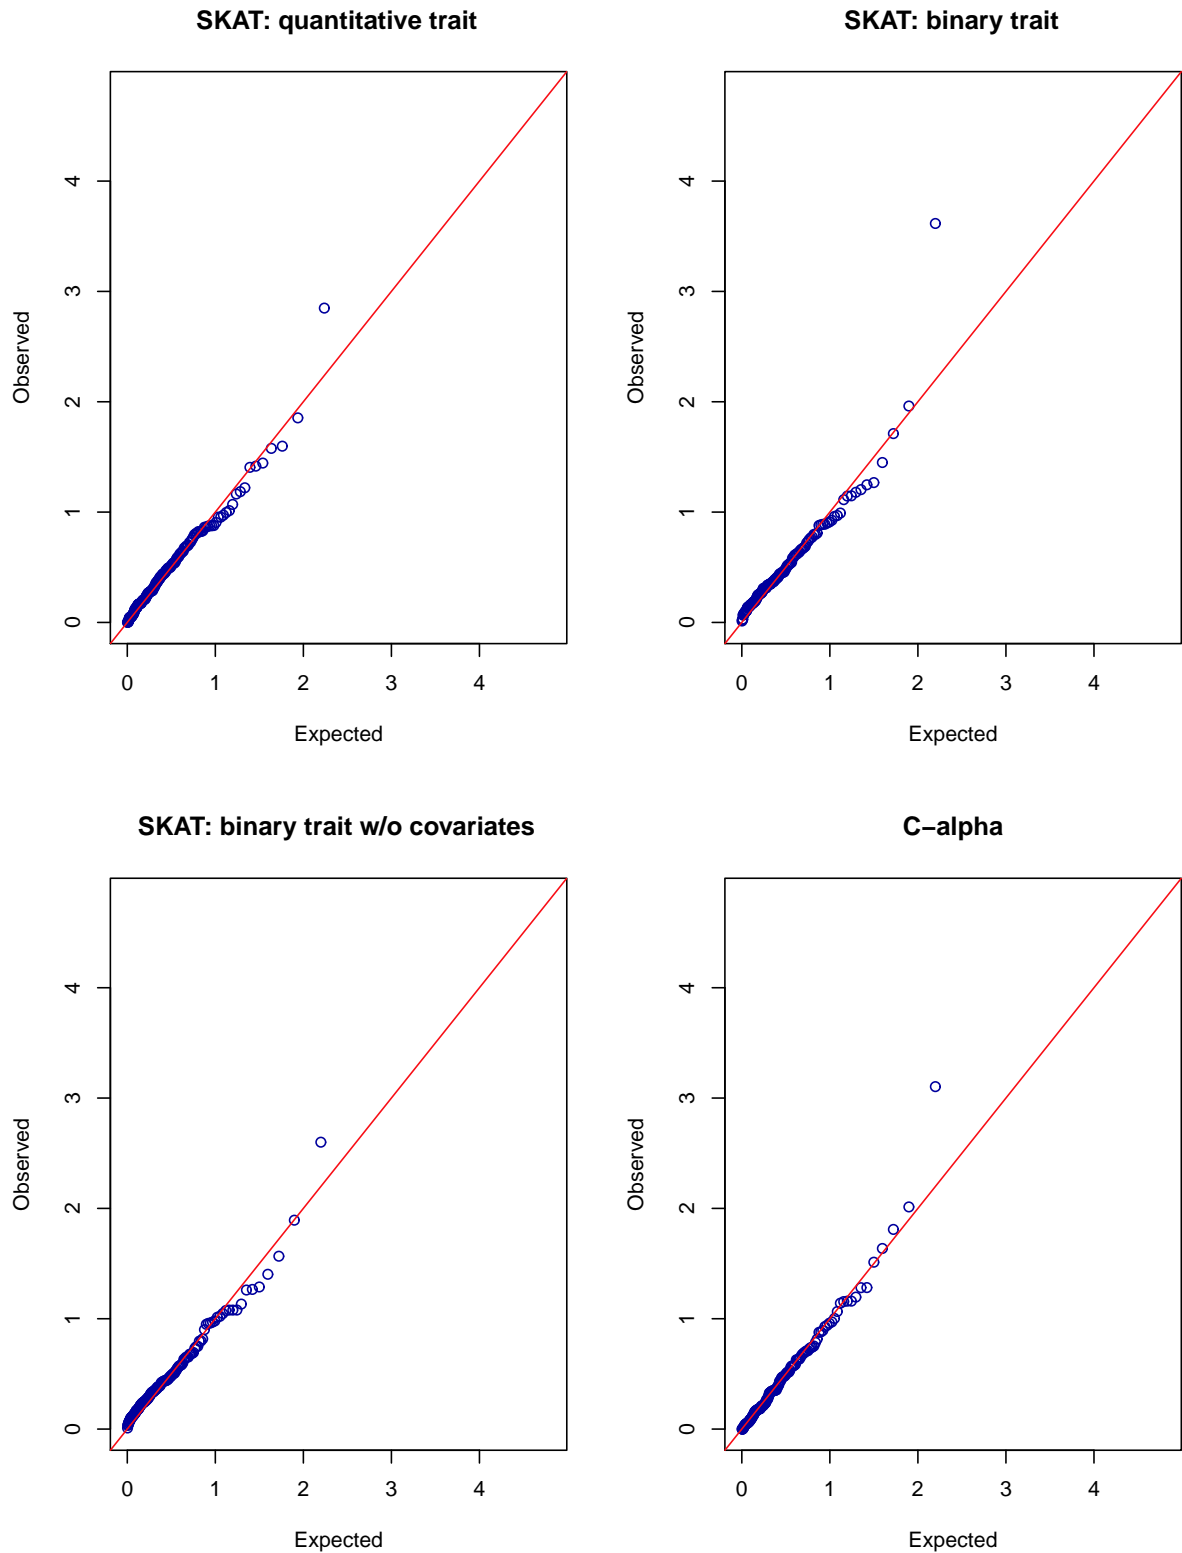

Figure S1. Quantile-quantile plots of  $-\log_{10}(p\text{-values})$  for the SKAT in the quantitative and binary trait analyses of total cholesterol with covariates (top panel) and for the SKAT and C-alpha in the binary trait analysis of total cholesterol without covariates (bottom panel).

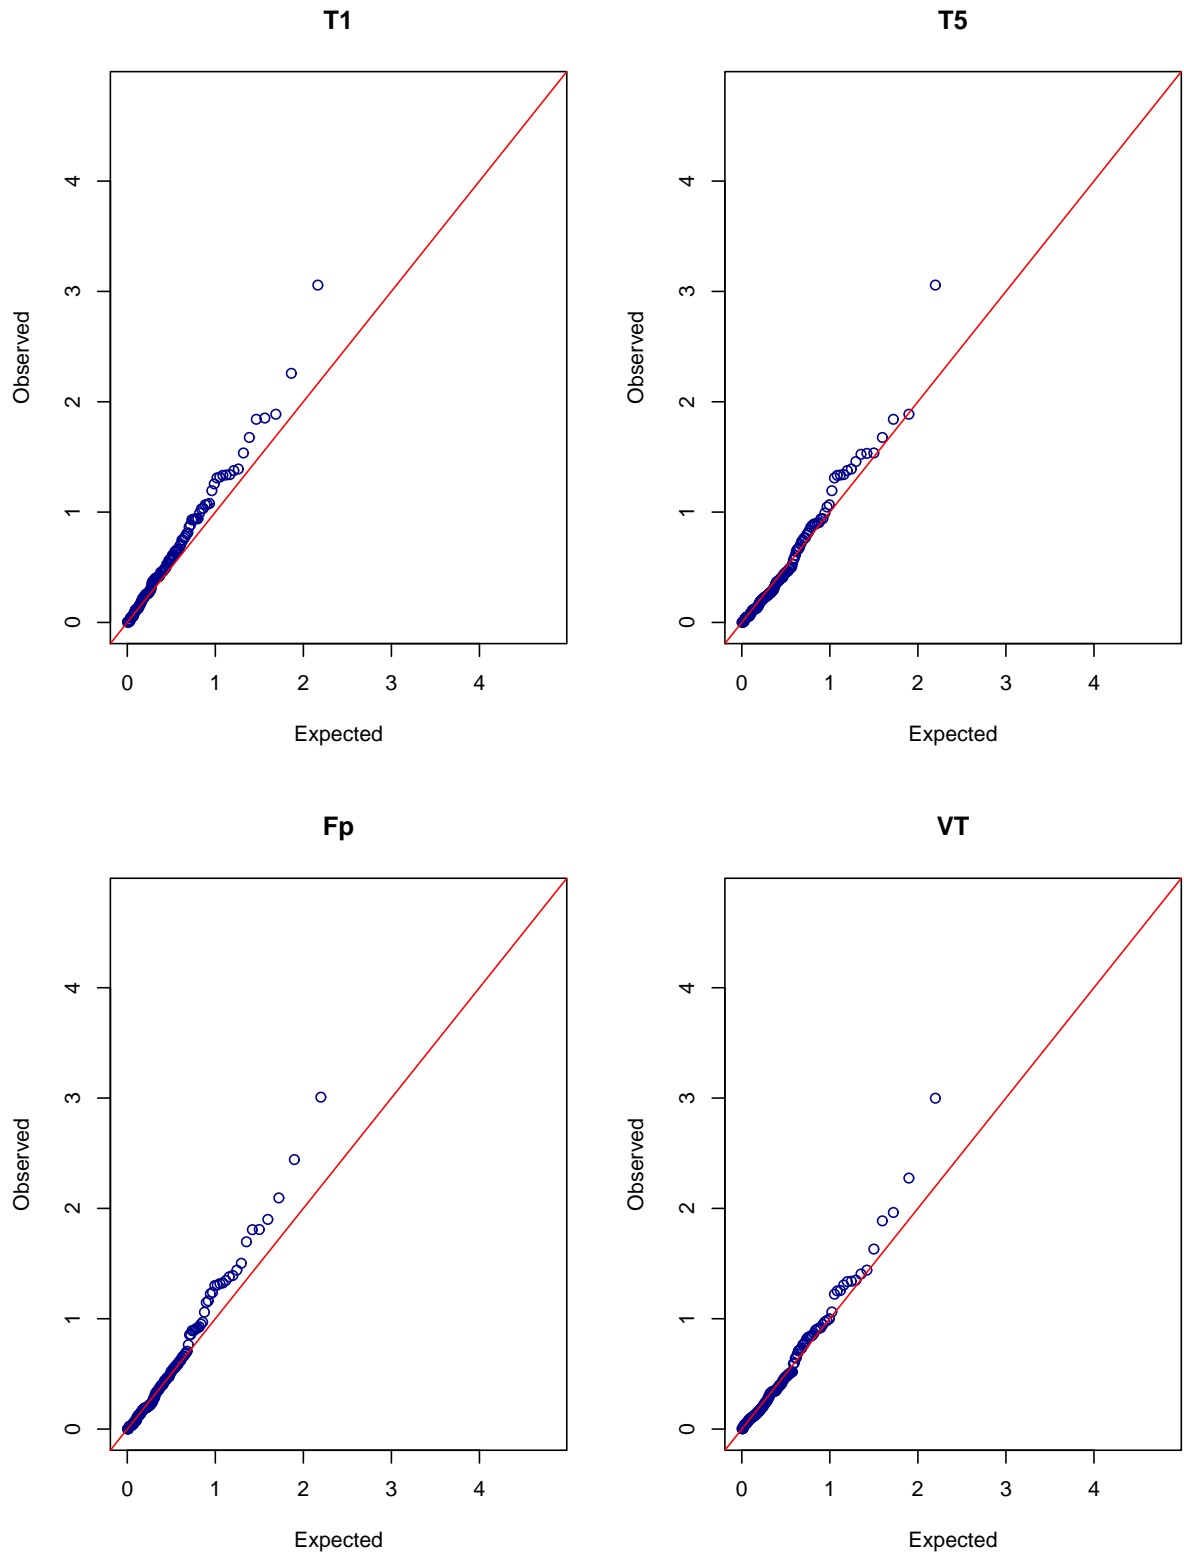

Figure S2. Quantile-quantile plots of  $-\log_{10}(p\text{-values})$  for the asymptotic T1, T5,  $F_p$  and VT tests in the binary trait analysis of total cholesterol without covariates.

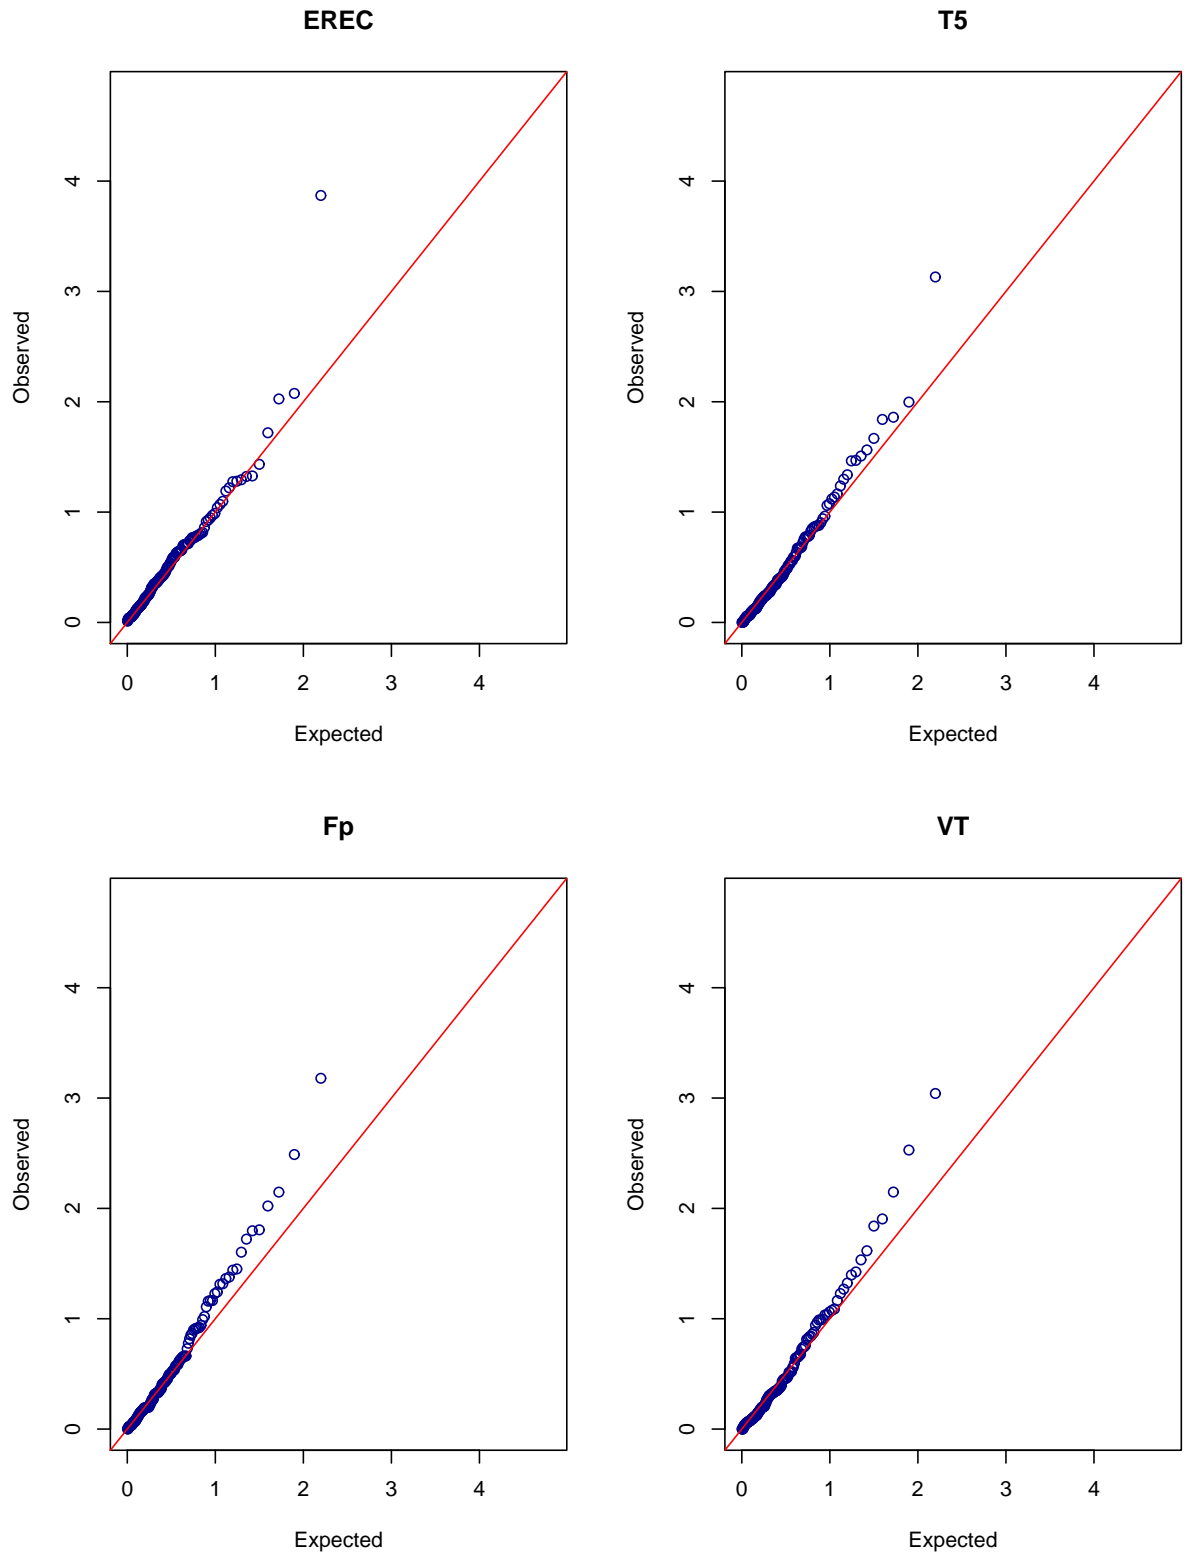

Figure S3. Quantile-quantile plots of  $-\log_{10}(p\text{-values})$  for the permutation EREC, T5,  $F_p$  and VT tests in the binary trait analysis of total cholesterol without covariates.

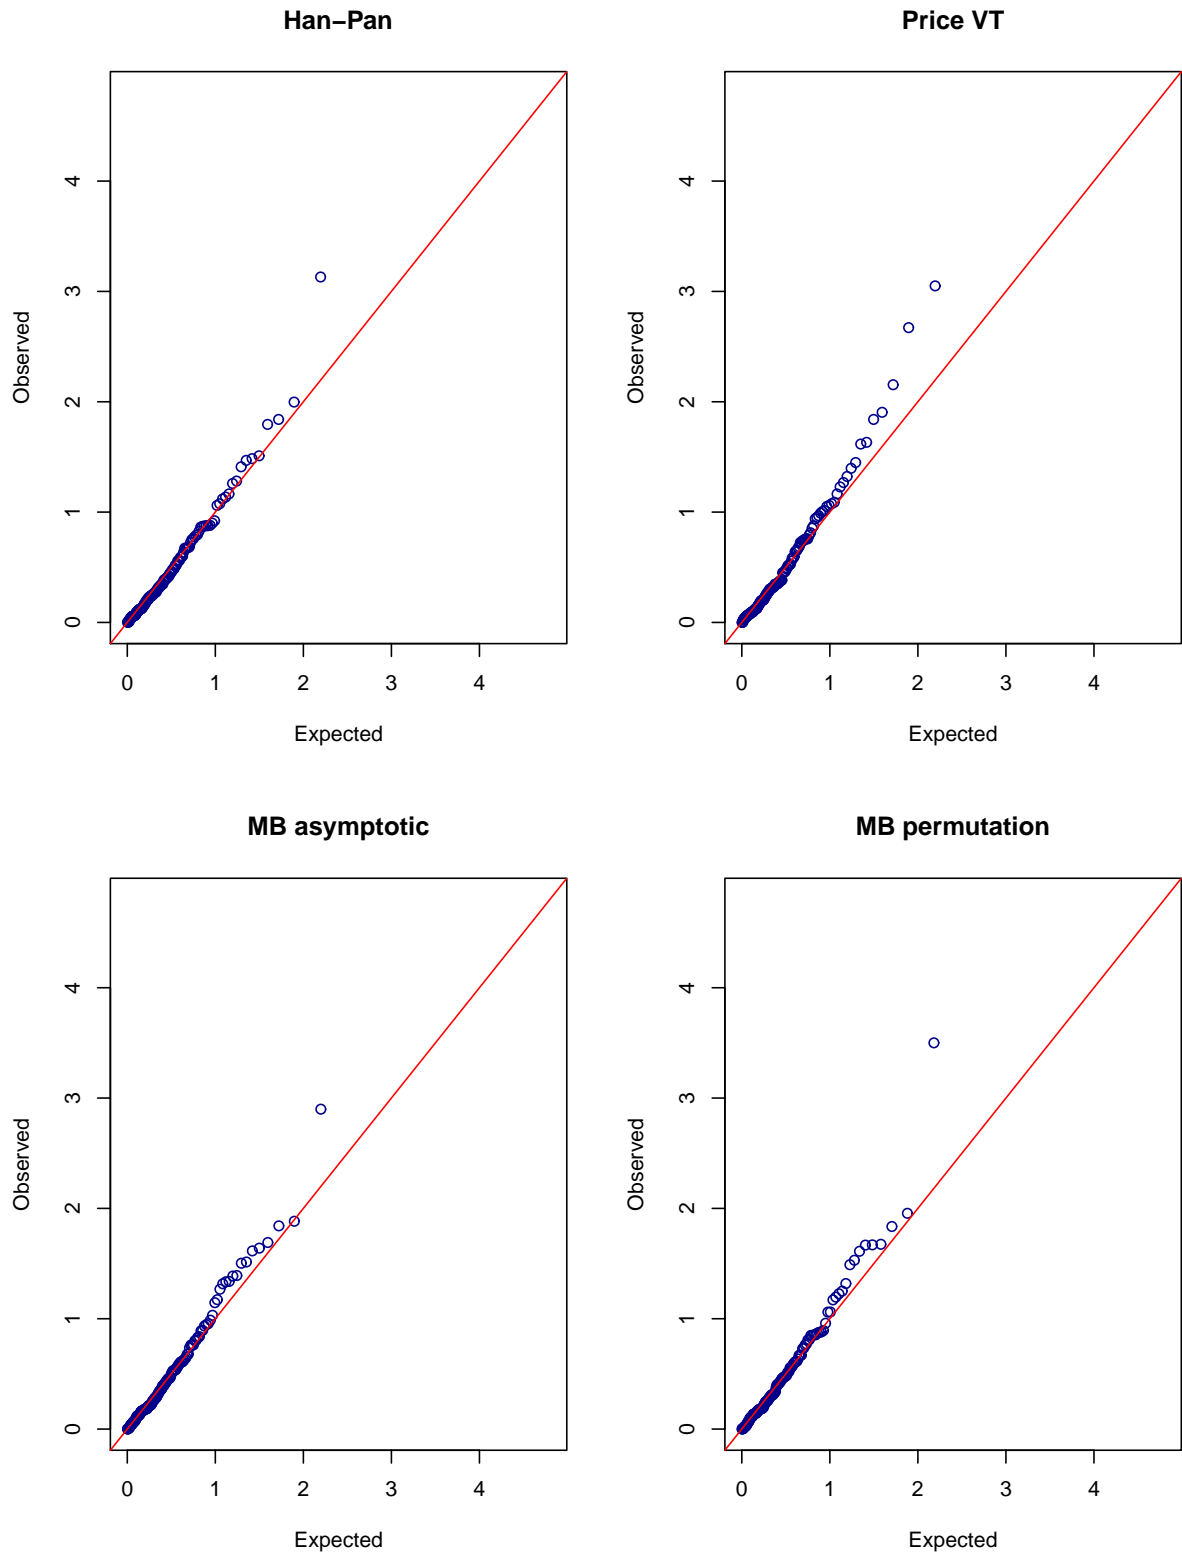

Figure S4. Quantile-quantile plots of  $-\log_{10}(p\text{-values})$  for the Han-Pan test, Price et al.'s VT test, and the asymptotic and permutation versions of the MB test in the binary trait analysis of total cholesterol without covariates.

**Table S1. Type I Error<sup>a</sup> and Power of Asymptotic Methods With Different Weight Functions Under  $p_j = 0.0005j$  ( $j = 1, \dots, 10$ )**

| $n$  | $\alpha$  | $H_0 : \beta_j = 0$ |       |            |       | $H_1 : \beta_j = x$ |       |            |       | $\beta_j = x/\{p_j(1 - p_j)\}^{1/2}$ |       |            |       |
|------|-----------|---------------------|-------|------------|-------|---------------------|-------|------------|-------|--------------------------------------|-------|------------|-------|
|      |           | $C$                 | $F_p$ | $T_{\max}$ | $F_u$ | $C$                 | $F_p$ | $T_{\max}$ | $F_u$ | $C$                                  | $F_p$ | $T_{\max}$ | $F_u$ |
| 500  | $10^{-2}$ | 0.87                | 0.89  | 0.87       | 1.81  | 0.77                | 0.75  | 0.77       | 0.88  | 0.79                                 | 0.80  | 0.79       | 0.91  |
|      | $10^{-3}$ | 0.68                | 0.66  | 0.62       | 1.62  | 0.49                | 0.45  | 0.48       | 0.66  | 0.51                                 | 0.52  | 0.51       | 0.70  |
|      | $10^{-4}$ | 0.47                | 0.36  | 0.36       | 1.10  | 0.24                | 0.21  | 0.22       | 0.38  | 0.25                                 | 0.26  | 0.25       | 0.42  |
| 1000 | $10^{-2}$ | 0.96                | 0.94  | 0.93       | 2.12  | 0.78                | 0.75  | 0.77       | 0.88  | 0.92                                 | 0.93  | 0.93       | 0.97  |
|      | $10^{-3}$ | 0.88                | 0.81  | 0.80       | 2.55  | 0.51                | 0.46  | 0.49       | 0.66  | 0.73                                 | 0.76  | 0.75       | 0.88  |
|      | $10^{-4}$ | 0.72                | 0.64  | 0.64       | 2.60  | 0.27                | 0.23  | 0.25       | 0.41  | 0.49                                 | 0.52  | 0.51       | 0.70  |
| 2000 | $10^{-2}$ | 0.97                | 0.97  | 0.96       | 1.96  | 0.82                | 0.78  | 0.81       | 0.88  | 0.97                                 | 0.98  | 0.97       | 0.99  |
|      | $10^{-3}$ | 0.93                | 0.89  | 0.89       | 2.53  | 0.56                | 0.51  | 0.55       | 0.68  | 0.86                                 | 0.89  | 0.88       | 0.95  |
|      | $10^{-4}$ | 0.80                | 0.76  | 0.75       | 3.00  | 0.32                | 0.27  | 0.30       | 0.44  | 0.68                                 | 0.72  | 0.71       | 0.84  |
| 4000 | $10^{-2}$ | 0.99                | 0.98  | 0.98       | 1.64  | 0.72                | 0.68  | 0.71       | 0.79  | 0.98                                 | 0.98  | 0.98       | 0.99  |
|      | $10^{-3}$ | 0.95                | 0.93  | 0.93       | 2.05  | 0.45                | 0.40  | 0.43       | 0.54  | 0.89                                 | 0.92  | 0.91       | 0.96  |
|      | $10^{-4}$ | 0.90                | 0.83  | 0.86       | 2.49  | 0.23                | 0.19  | 0.22       | 0.30  | 0.73                                 | 0.78  | 0.77       | 0.87  |

<sup>a</sup> divided by  $\alpha$

**Table S2. Type I Error<sup>a</sup> and Power of Asymptotic Methods With Different Weight Functions Under  $p_j = 0.00025j$  ( $j = 1 \dots, 20$ )**

| $n$  | $\alpha$  | $H_0 : \beta_j = 0$ |       |            |       | $H_1 : \beta_j = x$ |       |            |       | $H_1 : \beta_j = x / \{p_j(1 - p_j)\}^{1/2}$ |       |            |       |
|------|-----------|---------------------|-------|------------|-------|---------------------|-------|------------|-------|----------------------------------------------|-------|------------|-------|
|      |           | $C$                 | $F_p$ | $T_{\max}$ | $F_u$ | $C$                 | $F_p$ | $T_{\max}$ | $F_u$ | $C$                                          | $F_p$ | $T_{\max}$ | $F_u$ |
| 500  | $10^{-2}$ | 0.95                | 0.94  | 0.93       | 3.18  | 0.75                | 0.72  | 0.74       | 0.91  | 0.90                                         | 0.91  | 0.91       | 0.98  |
|      | $10^{-3}$ | 0.85                | 0.82  | 0.81       | 4.18  | 0.46                | 0.43  | 0.45       | 0.72  | 0.70                                         | 0.72  | 0.72       | 0.90  |
|      | $10^{-4}$ | 0.66                | 0.62  | 0.60       | 4.53  | 0.22                | 0.20  | 0.21       | 0.46  | 0.45                                         | 0.47  | 0.46       | 0.74  |
| 1000 | $10^{-2}$ | 0.97                | 0.97  | 0.96       | 3.52  | 0.79                | 0.75  | 0.78       | 0.92  | 0.72                                         | 0.75  | 0.74       | 0.91  |
|      | $10^{-3}$ | 0.92                | 0.88  | 0.88       | 5.54  | 0.52                | 0.48  | 0.51       | 0.75  | 0.44                                         | 0.47  | 0.46       | 0.74  |
|      | $10^{-4}$ | 0.78                | 0.75  | 0.74       | 7.85  | 0.28                | 0.25  | 0.27       | 0.52  | 0.22                                         | 0.24  | 0.23       | 0.51  |
| 2000 | $10^{-2}$ | 0.99                | 0.99  | 0.99       | 3.00  | 0.91                | 0.88  | 0.91       | 0.96  | 0.63                                         | 0.67  | 0.66       | 0.85  |
|      | $10^{-3}$ | 0.96                | 0.93  | 0.94       | 4.79  | 0.73                | 0.68  | 0.72       | 0.86  | 0.35                                         | 0.38  | 0.37       | 0.63  |
|      | $10^{-4}$ | 0.88                | 0.86  | 0.87       | 7.07  | 0.50                | 0.44  | 0.49       | 0.69  | 0.16                                         | 0.18  | 0.17       | 0.39  |
| 4000 | $10^{-2}$ | 1.00                | 1.00  | 0.99       | 2.30  | 0.96                | 0.95  | 0.96       | 0.98  | 0.94                                         | 0.96  | 0.95       | 0.99  |
|      | $10^{-3}$ | 0.99                | 0.97  | 0.97       | 3.36  | 0.86                | 0.82  | 0.85       | 0.92  | 0.79                                         | 0.84  | 0.83       | 0.93  |
|      | $10^{-4}$ | 0.98                | 0.92  | 0.95       | 4.70  | 0.68                | 0.62  | 0.67       | 0.79  | 0.58                                         | 0.65  | 0.63       | 0.81  |

<sup>a</sup> divided by  $\alpha$

**Table S3. Type I Error<sup>a</sup> and Power of Asymptotic Methods With Different Weight Functions Under  $p_j = 0.005$  ( $j = 1, \dots, 10$ )**

| $n$  | $\alpha$  | $H_0 : \beta_j = 0$ |       |            |       | $H_1 : \beta_j = x$ |       |            |       | $H_1 : \beta_j = x / \{p_j(1 - p_j)\}^{1/2}$ |       |            |       |
|------|-----------|---------------------|-------|------------|-------|---------------------|-------|------------|-------|----------------------------------------------|-------|------------|-------|
|      |           | $C$                 | $F_p$ | $T_{\max}$ | $F_u$ | $C$                 | $F_p$ | $T_{\max}$ | $F_u$ | $C$                                          | $F_p$ | $T_{\max}$ | $F_u$ |
| 500  | $10^{-2}$ | 0.94                | 0.94  | 0.93       | 2.34  | 0.72                | 0.70  | 0.71       | 0.85  | 0.79                                         | 0.78  | 0.79       | 0.90  |
|      | $10^{-3}$ | 0.82                | 0.81  | 0.80       | 2.83  | 0.43                | 0.41  | 0.42       | 0.62  | 0.51                                         | 0.50  | 0.51       | 0.70  |
|      | $10^{-4}$ | 0.62                | 0.60  | 0.58       | 2.86  | 0.20                | 0.19  | 0.19       | 0.36  | 0.27                                         | 0.25  | 0.26       | 0.44  |
| 1000 | $10^{-2}$ | 0.98                | 0.98  | 0.97       | 2.13  | 0.76                | 0.75  | 0.76       | 0.86  | 0.91                                         | 0.91  | 0.91       | 0.96  |
|      | $10^{-3}$ | 0.92                | 0.91  | 0.91       | 2.94  | 0.49                | 0.48  | 0.49       | 0.64  | 0.74                                         | 0.72  | 0.73       | 0.84  |
|      | $10^{-4}$ | 0.81                | 0.74  | 0.76       | 3.76  | 0.26                | 0.25  | 0.25       | 0.40  | 0.50                                         | 0.48  | 0.49       | 0.65  |
| 2000 | $10^{-2}$ | 0.98                | 0.98  | 0.98       | 1.61  | 0.89                | 0.89  | 0.89       | 0.94  | 0.97                                         | 0.96  | 0.97       | 0.98  |
|      | $10^{-3}$ | 0.96                | 0.96  | 0.96       | 2.06  | 0.70                | 0.70  | 0.70       | 0.79  | 0.86                                         | 0.86  | 0.86       | 0.91  |
|      | $10^{-4}$ | 0.90                | 0.91  | 0.91       | 2.56  | 0.47                | 0.46  | 0.46       | 0.58  | 0.68                                         | 0.67  | 0.68       | 0.78  |
| 4000 | $10^{-2}$ | 0.99                | 0.99  | 0.99       | 1.29  | 0.96                | 0.96  | 0.96       | 0.97  | 0.98                                         | 0.98  | 0.98       | 0.99  |
|      | $10^{-3}$ | 0.97                | 0.97  | 0.97       | 1.48  | 0.84                | 0.83  | 0.84       | 0.88  | 0.90                                         | 0.90  | 0.90       | 0.93  |
|      | $10^{-4}$ | 0.94                | 0.92  | 0.92       | 1.67  | 0.65                | 0.64  | 0.64       | 0.72  | 0.74                                         | 0.74  | 0.74       | 0.81  |

<sup>a</sup> divided by  $\alpha$



**Table S4. Type I Error<sup>a</sup> and Power of Asymptotic Methods With Different Weight Functions Under  $p_j = 0.0025$  ( $j = 1, \dots, 10$ )**

| $n$  | $\alpha$  | $H_0 : \beta_j = 0$ |       |            |       | $H_1 : \beta_j = x$ |       |            |       | $H_1 : \beta_j = x / \{p_j(1 - p_j)\}^{1/2}$ |       |            |       |
|------|-----------|---------------------|-------|------------|-------|---------------------|-------|------------|-------|----------------------------------------------|-------|------------|-------|
|      |           | $C$                 | $F_p$ | $T_{\max}$ | $F_u$ | $C$                 | $F_p$ | $T_{\max}$ | $F_u$ | $C$                                          | $F_p$ | $T_{\max}$ | $F_u$ |
| 500  | $10^{-2}$ | 0.85                | 0.88  | 0.86       | 1.85  | 0.82                | 0.81  | 0.82       | 0.92  | 0.82                                         | 0.81  | 0.82       | 0.92  |
|      | $10^{-3}$ | 0.67                | 0.64  | 0.62       | 1.58  | 0.56                | 0.54  | 0.55       | 0.73  | 0.56                                         | 0.54  | 0.55       | 0.74  |
|      | $10^{-4}$ | 0.41                | 0.36  | 0.32       | 0.92  | 0.29                | 0.27  | 0.28       | 0.46  | 0.29                                         | 0.27  | 0.28       | 0.46  |
| 1000 | $10^{-2}$ | 0.97                | 0.94  | 0.94       | 2.36  | 0.93                | 0.93  | 0.93       | 0.97  | 0.94                                         | 0.93  | 0.93       | 0.97  |
|      | $10^{-3}$ | 0.86                | 0.82  | 0.81       | 2.91  | 0.78                | 0.76  | 0.77       | 0.89  | 0.78                                         | 0.76  | 0.77       | 0.89  |
|      | $10^{-4}$ | 0.66                | 0.64  | 0.62       | 3.00  | 0.55                | 0.53  | 0.54       | 0.72  | 0.55                                         | 0.53  | 0.54       | 0.72  |
| 2000 | $10^{-2}$ | 0.97                | 0.97  | 0.96       | 2.13  | 0.91                | 0.91  | 0.91       | 0.96  | 0.98                                         | 0.97  | 0.97       | 0.99  |
|      | $10^{-3}$ | 0.91                | 0.89  | 0.89       | 2.94  | 0.73                | 0.72  | 0.72       | 0.84  | 0.89                                         | 0.89  | 0.89       | 0.94  |
|      | $10^{-4}$ | 0.84                | 0.82  | 0.82       | 3.64  | 0.49                | 0.48  | 0.49       | 0.65  | 0.73                                         | 0.72  | 0.72       | 0.84  |
| 4000 | $10^{-2}$ | 0.99                | 0.99  | 0.99       | 1.61  | 0.90                | 0.90  | 0.90       | 0.94  | 0.98                                         | 0.98  | 0.98       | 0.99  |
|      | $10^{-3}$ | 0.95                | 0.95  | 0.94       | 2.06  | 0.71                | 0.70  | 0.70       | 0.80  | 0.92                                         | 0.91  | 0.92       | 0.95  |
|      | $10^{-4}$ | 0.91                | 0.93  | 0.91       | 2.62  | 0.47                | 0.47  | 0.47       | 0.59  | 0.78                                         | 0.78  | 0.78       | 0.86  |

<sup>a</sup> divided by  $\alpha$

**Table S5. Type I Error<sup>a</sup> and Power of Asymptotic Methods With Different Weight Functions Under  $p_j = 0.0025$  ( $j = 1, \dots, 20$ )**

| $n$  | $\alpha$  | $H_0 : \beta_j = 0$ |       |            |       | $H_1 : \beta_j = x$ |       |            |       | $H_1 : \beta_j = x/\{p_j(1 - p_j)\}^{1/2}$ |       |            |       |
|------|-----------|---------------------|-------|------------|-------|---------------------|-------|------------|-------|--------------------------------------------|-------|------------|-------|
|      |           | $C$                 | $F_p$ | $T_{\max}$ | $F_u$ | $C$                 | $F_p$ | $T_{\max}$ | $F_u$ | $C$                                        | $F_p$ | $T_{\max}$ | $F_u$ |
| 500  | $10^{-2}$ | 0.94                | 0.94  | 0.93       | 3.52  | 0.72                | 0.70  | 0.71       | 0.91  | 0.93                                       | 0.92  | 0.92       | 0.99  |
|      | $10^{-3}$ | 0.82                | 0.81  | 0.80       | 4.68  | 0.43                | 0.41  | 0.42       | 0.72  | 0.76                                       | 0.73  | 0.75       | 0.92  |
|      | $10^{-4}$ | 0.65                | 0.65  | 0.62       | 5.11  | 0.20                | 0.19  | 0.20       | 0.46  | 0.51                                       | 0.49  | 0.50       | 0.78  |
| 1000 | $10^{-2}$ | 0.97                | 0.97  | 0.97       | 4.13  | 0.76                | 0.75  | 0.76       | 0.92  | 0.76                                       | 0.75  | 0.76       | 0.92  |
|      | $10^{-3}$ | 0.93                | 0.92  | 0.90       | 6.92  | 0.49                | 0.47  | 0.48       | 0.76  | 0.49                                       | 0.47  | 0.48       | 0.76  |
|      | $10^{-4}$ | 0.79                | 0.80  | 0.77       | 10.09 | 0.25                | 0.24  | 0.25       | 0.53  | 0.26                                       | 0.24  | 0.25       | 0.53  |
| 2000 | $10^{-2}$ | 0.99                | 0.99  | 0.99       | 3.30  | 0.90                | 0.89  | 0.89       | 0.97  | 0.68                                       | 0.67  | 0.67       | 0.85  |
|      | $10^{-3}$ | 0.96                | 0.95  | 0.95       | 5.60  | 0.70                | 0.69  | 0.70       | 0.87  | 0.39                                       | 0.38  | 0.39       | 0.63  |
|      | $10^{-4}$ | 0.86                | 0.88  | 0.85       | 8.94  | 0.46                | 0.45  | 0.46       | 0.70  | 0.19                                       | 0.18  | 0.18       | 0.40  |
| 4000 | $10^{-2}$ | 0.99                | 0.99  | 0.99       | 2.17  | 0.96                | 0.95  | 0.96       | 0.98  | 0.96                                       | 0.95  | 0.95       | 0.98  |
|      | $10^{-3}$ | 0.98                | 0.98  | 0.98       | 3.17  | 0.84                | 0.83  | 0.83       | 0.92  | 0.84                                       | 0.83  | 0.83       | 0.92  |
|      | $10^{-4}$ | 0.98                | 1.00  | 1.00       | 4.54  | 0.64                | 0.64  | 0.64       | 0.79  | 0.65                                       | 0.64  | 0.64       | 0.79  |

<sup>a</sup> divided by  $\alpha$

**Table S6. Type I Error<sup>a</sup> of Score, Wald and LR Tests With Covariates**

| <i>n</i> | $\alpha$  | $p_j = 0.001j$ ( $j = 1, \dots, 10$ ) |                      |          |                      |          |                      | $p_j = 0.0005j$ ( $j = 1, \dots, 10$ ) |                      |          |                      |          |                      |
|----------|-----------|---------------------------------------|----------------------|----------|----------------------|----------|----------------------|----------------------------------------|----------------------|----------|----------------------|----------|----------------------|
|          |           | Score                                 |                      | Wald     |                      | LR       |                      | Score                                  |                      | Wald     |                      | LR       |                      |
|          |           | <i>C</i>                              | <i>F<sub>p</sub></i> | <i>C</i> | <i>F<sub>p</sub></i> | <i>C</i> | <i>F<sub>p</sub></i> | <i>C</i>                               | <i>F<sub>p</sub></i> | <i>C</i> | <i>F<sub>p</sub></i> | <i>C</i> | <i>F<sub>p</sub></i> |
| 500      | $10^{-2}$ | 0.98                                  | 0.97                 | 0.84     | 0.79                 | 1.05     | 1.06                 | 0.94                                   | 0.92                 | 0.65     | 0.59                 | 1.09     | 1.10                 |
|          | $10^{-3}$ | 0.90                                  | 0.85                 | 0.59     | 0.49                 | 1.08     | 1.09                 | 0.81                                   | 0.76                 | 0.26     | 0.20                 | 1.15     | 1.17                 |
|          | $10^{-4}$ | 0.78                                  | 0.70                 | 0.31     | 0.23                 | 1.08     | 1.09                 | 0.67                                   | 0.58                 | 0.08     | 0.04                 | 1.27     | 1.27                 |
| 1000     | $10^{-2}$ | 0.99                                  | 0.98                 | 0.92     | 0.88                 | 1.03     | 1.03                 | 0.97                                   | 0.96                 | 0.84     | 0.79                 | 1.04     | 1.05                 |
|          | $10^{-3}$ | 0.95                                  | 0.92                 | 0.78     | 0.69                 | 1.03     | 1.04                 | 0.90                                   | 0.86                 | 0.59     | 0.49                 | 1.07     | 1.07                 |
|          | $10^{-4}$ | 0.90                                  | 0.84                 | 0.61     | 0.50                 | 1.04     | 1.06                 | 0.80                                   | 0.78                 | 0.36     | 0.26                 | 1.11     | 1.13                 |

<sup>a</sup> divided by  $\alpha$

**Table S7. Power of Score, Wald and LR Tests With Covariates Under  $H_1 : \beta_j = x$  ( $j = 1, \dots, 10$ )**

| $n$  | $\alpha$  | $p_j = 0.001j$ ( $j = 1, \dots, 10$ ) |       |      |       |      |       | $p_j = 0.0005j$ ( $j = 1, \dots, 10$ ) |       |      |       |      |       |
|------|-----------|---------------------------------------|-------|------|-------|------|-------|----------------------------------------|-------|------|-------|------|-------|
|      |           | Score                                 |       | Wald |       | LR   |       | Score                                  |       | Wald |       | LR   |       |
|      |           | $C$                                   | $F_p$ | $C$  | $F_p$ | $C$  | $F_p$ | $C$                                    | $F_p$ | $C$  | $F_p$ | $C$  | $F_p$ |
| 500  | $10^{-2}$ | 0.68                                  | 0.63  | 0.66 | 0.61  | 0.69 | 0.66  | 0.60                                   | 0.56  | 0.56 | 0.52  | 0.63 | 0.60  |
|      | $10^{-3}$ | 0.38                                  | 0.33  | 0.34 | 0.29  | 0.41 | 0.38  | 0.28                                   | 0.25  | 0.21 | 0.17  | 0.34 | 0.32  |
|      | $10^{-4}$ | 0.16                                  | 0.13  | 0.13 | 0.09  | 0.20 | 0.18  | 0.10                                   | 0.08  | 0.04 | 0.02  | 0.15 | 0.14  |
| 1000 | $10^{-2}$ | 0.74                                  | 0.69  | 0.73 | 0.68  | 0.75 | 0.71  | 0.73                                   | 0.69  | 0.72 | 0.67  | 0.75 | 0.72  |
|      | $10^{-3}$ | 0.45                                  | 0.40  | 0.44 | 0.38  | 0.48 | 0.43  | 0.44                                   | 0.39  | 0.40 | 0.35  | 0.48 | 0.44  |
|      | $10^{-4}$ | 0.22                                  | 0.18  | 0.20 | 0.16  | 0.25 | 0.22  | 0.20                                   | 0.17  | 0.16 | 0.12  | 0.25 | 0.22  |

**Table S8. Power of Score, Wald and LR Tests With Covariates Under  $H_1 : \beta_j = x/\{p_j(1 - p_j)\}^{1/2}$  ( $j = 1, \dots, 10$ )**

| $n$  | $\alpha$  | $p_j = 0.001j$ ( $j = 1, \dots, 10$ ) |       |      |       |      |       | $p_j = 0.0005j$ ( $j = 1, \dots, 10$ ) |       |      |       |      |       |
|------|-----------|---------------------------------------|-------|------|-------|------|-------|----------------------------------------|-------|------|-------|------|-------|
|      |           | Score                                 |       | Wald |       | LR   |       | Score                                  |       | Wald |       | LR   |       |
|      |           | $C$                                   | $F_p$ | $C$  | $F_p$ | $C$  | $F_p$ | $C$                                    | $F_p$ | $C$  | $F_p$ | $C$  | $F_p$ |
| 500  | $10^{-2}$ | 0.66                                  | 0.68  | 0.64 | 0.66  | 0.67 | 0.71  | 0.72                                   | 0.73  | 0.69 | 0.69  | 0.74 | 0.76  |
|      | $10^{-3}$ | 0.35                                  | 0.38  | 0.32 | 0.33  | 0.39 | 0.42  | 0.40                                   | 0.41  | 0.32 | 0.31  | 0.46 | 0.48  |
|      | $10^{-4}$ | 0.15                                  | 0.16  | 0.11 | 0.11  | 0.19 | 0.21  | 0.17                                   | 0.17  | 0.08 | 0.06  | 0.24 | 0.25  |
| 1000 | $10^{-2}$ | 0.83                                  | 0.86  | 0.82 | 0.85  | 0.84 | 0.87  | 0.88                                   | 0.90  | 0.87 | 0.89  | 0.89 | 0.91  |
|      | $10^{-3}$ | 0.58                                  | 0.62  | 0.56 | 0.60  | 0.60 | 0.65  | 0.65                                   | 0.68  | 0.62 | 0.64  | 0.68 | 0.72  |
|      | $10^{-4}$ | 0.33                                  | 0.36  | 0.30 | 0.33  | 0.36 | 0.41  | 0.39                                   | 0.41  | 0.33 | 0.34  | 0.44 | 0.48  |
